# Supplementary material for: The Impact of Edema on MRI Radiomics for the Prediction of Lung Metastasis in Soft Tissue Sarcoma
Source: MDPI journal article supplement (doi:10.3390/diagnostics13193134), 2023-10-05
Supplement: s1 [file Supplementary Table S1.xlsx]

## Sheet: Clinical data
Patient ID	Age	Sex	Histological type	MSKCC type	Site of primary STS	Grade	Treatment	Status (NED, AWD, D)	Time – diagnosis to last follow-up (days)	Time – diagnosis to outcome (days)	Outcome (recurrence, mets)	LungMets
STS_001	59	Male	pleiomorphic liposarcoma	Liposarcoma	left thigh	High	Radiotherapy + Surgery + Chemotherapy	D	845	266	Mets – arms	0
STS_002	61	Male	pleiomorphic leiomyosarcoma	Leiomyosarcoma	left buttock	High	Radiotherapy + Surgery	NED	501	--	--	0
STS_003	17	Female	epithelioid sarcoma	Other	right buttock	Intermediate	Radiotherapy + Surgery	NED	756	--	--	0
STS_005	83	Female	pleiomorphic leiomyosarcoma	Leiomyosarcoma	left biceps	High	Radiotherapy + Surgery	NED	647	--	--	0
STS_009	60	Male	myxofibrosarcoma - undifferentiated	MFH	right thigh	High	Radiotherapy + Surgery + Chemotherapy	D	257	101	Mets – lungs	1
STS_010	60	Female	myxofibrosarcoma	MFH	left calf	High	Radiotherapy + Surgery	NED	790	--	--	0
STS_011	56	Female	malignant solitary fibrous tumor	Other	right thigh	Intermediate	Radiotherapy + Surgery	NED	637	--	--	0
STS_012	62	Female	sclerosing epithelioid fibrosarcoma	Fibrosarcoma	right thigh	Intermediate	Radiotherapy + Surgery	D	663	235	Mets – bones	0
STS_014	56	Male	pleiomorphic leiomyosarcoma	Leiomyosarcoma	right thigh	Intermediate	Radiotherapy + Surgery + Chemotherapy	D	934	157	Mets – lungs	1
STS_015	34	Female	synovial sarcoma	Synovial sarcoma	right thigh	Intermediate	Radiotherapy + Surgery	NED	651	--	--	0
STS_016	75	Female	spindle cell suggestive of pleomorphic liposarcoma	Liposarcoma	left thigh	Intermediate	Radiotherapy + Surgery	NED	760	--	--	0
STS_020	78	Female	pleomorphic sarcoma	MFH	left thigh	High	Radiotherapy + Surgery	AWD	377	66	Recurrence – regional	0
STS_021	49	Male	undifferentiated - pleiomorphic	MFH	right thigh	High	Radiotherapy + Surgery + Chemotherapy	AWD	779	731	Mets – lungs	1
STS_022	65	Male	myxoid fibrosarcoma	MFH	left thigh	Intermediate	Radiotherapy + Surgery + Chemotherapy	AWD	881	357	Mets – lungs	1
STS_023	65	Male	myxofibrosarcoma	MFH	left thigh	Intermediate	Radiotherapy + Surgery + Chemotherapy	D	287	98	Mets – lungs	1
STS_024	48	Male	pleiomorphic leiomyosarcoma	Leiomyosarcoma	left thigh	High	Radiotherapy + Surgery	NED	819	--	--	0
STS_027	62	Female	undifferentiated – high grade	MFH	left thigh	High	Radiotherapy + Surgery + Chemotherapy	AWD	626	132	Mets – lungs	1
STS_029	47	Female	myxofibrosarcoma	MFH	left thigh	Intermediate	Radiotherapy + Surgery	NED	574	--	--	0
STS_030	51	Male	liposarcoma, well diferentiated	Liposarcoma	right quadricep	Low	Radiotherapy + Surgery	NED	903	--	--	0
STS_031	70	Female	synovial sarcoma	Synovial sarcoma	right buttock	Intermediate	Surgery + Chemotherapy	D	804	94	Mets – lungs	1
STS_032	69	Male	pleiomorphic liposarcoma	Liposarcoma	right calf	High	Radiotherapy + Surgery	D	262	77	Mets – lungs	1
STS_033	74	Female	pleomorphic leiomyosarcoma	Leiomyosarcoma	left thigh	High	Radiotherapy + Surgery	AWD	415	167	Mets – lungs	1
STS_034	43	Male	poorly differentiated synovial sarcoma	Synovial sarcoma	right buttock	High	Surgery + Chemotherapy	D	838	76	Recurrence – local	0
STS_036	24	Female	leiomyosarcoma	Leiomyosarcoma	right groin	High	Radiotherapy + Surgery + Chemotherapy	NED	1329	--	--	0
STS_037	61	Male	pleiomorphic spindle cell undifferentiated	MFH	right parascapusular	High	Radiotherapy + Surgery + Chemotherapy	D	407	98	Mets – lungs	1
STS_038	63	Male	pleiomorphic liposarcoma	Liposarcoma	left thigh	High	Radiotherapy + Surgery	NED	707	483	Mets – lungs	1
STS_039	44	Male	undifferentiated pleomorphic liposarcoma	MFH	left thigh	High	Radiotherapy + Surgery + Chemotherapy	AWD	567	189	Mets – lungs	1
STS_041	78	Female	leiomyosarcoma	Leiomyosarcoma	parascapusular	Intermediate	Radiotherapy + Surgery	NED	458	--	--	0
STS_042	16	Female	spindle cell suggestive of biphasic synovial sarcoma	Synovial sarcoma	left knee	Intermediate	Radiotherapy + Surgery	NED	706	--	--	0
STS_046	57	Female	pleiomorphic undifferentiated sarcoma	MFH	right quadricep	High	Surgery + Chemotherapy	D	892	329	Mets – lungs	1
STS_048	42	Female	pleiomorphic leiomyosarcoma	Leiomyosarcoma	left thigh	Intermediate	Radiotherapy + Surgery	NED	465	--	--	0
STS_050	70	Female	pleiomorphic leiomyosarcoma	Leiomyosarcoma	left thigh	High	Radiotherapy + Surgery	NED	831	418	Mets – lungs	1
NOTES
MSKCC type: As defined by an expert radiation-oncologist of sending institution using the classification of the Memorial Sloan-Kettering Cancer Center.
Time – diagnosis to outcome: Days elapsed between the date of diagnosis of primary STS (biospy) and the date of diagnosis of recurrence or metastases.
Time – diagnosis to last follow-up: Days elapsed between the date of diagnosis of primary STS (biopsy) and the date of last-follow-up (or death, if applicable).
Status: No Evidence of Disease (NED), Alive With Disease (AWD), Dead (D).

## Sheet: MRI data
PatientName	Manufacturer	ManufacturerModelName	SeriesDescription	Plane	SliceThickness (mm)	PixelSpacing - Adjacent row spacing (mm)	PixelSpacing - Adjacent column spacing (mm)	Rows (number of rows in the image)	Columns (number of columns in the image)	Scanning Sequence (SE: Spin Echo, IR: Inversion Recovery, RM: Research Mode)
STS_001	SIEMENS	Avanto	AXIAL SE T2 FAT SAT - RESEARCH	Axial	4	0.523	0.523	384	384	SE
STS_002	Philips Medical Systems	Intera	STIR longTE AX	Axial	6.364	0.595	0.595	336	336	IR
STS_003	GE MEDICAL SYSTEMS	Signa HDxt	AX STIR	Axial	6	0.781	0.781	512	512	IR
STS_005	GE MEDICAL SYSTEMS	GENESIS_SIGNA	AXIALT2 FSE FS	Axial	6	0.43	0.43	512	512	RM
STS_009	GE MEDICAL SYSTEMS	SIGNA EXCITE	Axial FSE/T2 FS UPPER	Axial	5	0.859	0.859	512	512	SE
STS_010	GE MEDICAL SYSTEMS	GENESIS_SIGNA	3. AXIAL STIR - RESEARCH	Axial	6	0.586	0.586	512	512	IR
STS_011	GE MEDICAL SYSTEMS	SIGNA EXCITE	sag FSE/T2 Fatsat	Sagittal	5	0.801	0.801	512	512	SE
STS_012	GE MEDICAL SYSTEMS	GENESIS_SIGNA	5. AXIAL T2 F.S.	Axial	6	0.742	0.742	512	512	RM
STS_014	GE MEDICAL SYSTEMS	SIGNA EXCITE	AXIAL FRFSE T2 Fatsat - RESEARCH	Axial	6	0.469	0.469	512	512	SE
STS_015	GE MEDICAL SYSTEMS	Signa HDxt	AX STIR	Axial	4	0.742	0.742	512	512	IR
STS_016	SIEMENS	Avanto	AX STIR iPAT - RESEARCH	Axial	10	1.17188	1.17188	288	384	['SE', 'IR']
STS_020	GE MEDICAL SYSTEMS	SIGNA EXCITE	Coronal Fast Stir	Coronal	6	0.898	0.898	512	512	IR
STS_021	GE MEDICAL SYSTEMS	Signa HDxt	AX. STIR HAUT	Axial	6	1.1719	1.1719	256	256	IR
STS_022	GE MEDICAL SYSTEMS	Signa HDxt	AX STIR BILAT	Axial	8	0.84	0.84	512	512	IR
STS_023	SIEMENS	Avanto	COR STIR	Coronal	5	1.36719	1.36719	256	256	['SE', 'IR']
STS_024	Philips Medical Systems	Intera	T2ST LT	Axial	5	0.938	0.938	256	256	IR
STS_027	GE MEDICAL SYSTEMS	SIGNA EXCITE	Coronal Fast Stir - RESEARCH	Coronal	5	0.918	0.918	512	512	IR
STS_029	GE MEDICAL SYSTEMS	SIGNA EXCITE	Coronal Fast Stir	Coronal	5	0.898	0.898	512	512	IR
STS_030	Varian Medical Systems	ARIA RadOnc	Axial T2 FS RT LOWER - RESEARCH	Axial	8	0.547	0.547	512	512	SE
STS_031	GE MEDICAL SYSTEMS	SIGNA EXCITE	Axial T2 FS RT HIP/THIGH	Axial	5	0.547	0.547	512	512	SE
STD_032	GE MEDICAL SYSTEMS	SIGNA EXCITE	Axial FSE/T2 FS ONLY TUMOR - RESEARCH	Axial	4	0.547	0.547	512	512	SE
STS_033	GE MEDICAL SYSTEMS	SIGNA EXCITE	Axial FSE/T2 Fatsat - RESEARCH	Axial	6	0.82	0.82	512	512	SE
STS_034	SIEMENS	Avanto	AXIAL STIR	Axial	8	1.30208	1.30208	288	384	['IR', 'SE']
STS_036	GE MEDICAL SYSTEMS	SIGNA EXCITE	AXIAL FSE T2 - RESEARCH	Axial	5	0.781	0.781	512	512	SE
STS_037	SIEMENS	Symphony	AX STIR	Axial	5	0.586	0.586	456	512	['IR', 'SE']
STS_038	Philips Medical Systems	Intera	T2SP LT - RESEARCH	Axial	6	1.01562	1.01562	256	256	SE
STS_039	Philips Medical Systems	Intera	eSTIR_longTE SENSE W PICT-PLUS	Axial	5	0.599	0.599	384	384	IR
STS_041	GE MEDICAL SYSTEMS	SIGNA EXCITE	Axial FSE/T2 Fatsat	Axial	5	0.469	0.469	512	512	SE
STS_042	GE MEDICAL SYSTEMS	Signa HDxt	AX IR - RESEARCH	Axial	7	0.391	0.391	512	512	IR
STS_046	GE MEDICAL SYSTEMS	SIGNA EXCITE	Axial FSE/T2 Fatsat - RESEARCH	Axial	6	0.859	0.859	512	512	SE
STS_048	GE MEDICAL SYSTEMS	SIGNA EXCITE	Axial FSE/T2 Fatsat	Axial	5	0.586	0.586	512	512	SE
STS_050	GE MEDICAL SYSTEMS	SIGNA EXCITE	AX STIR	Axial	4	0.391	0.391	512	512	RM
